# Supplementary material for: Disulfiram Suppressed Peritendinous Fibrosis Through Inhibiting Macrophage Accumulation and Its Pro-inflammatory Properties in Tendon Bone Healing
Source: Front Bioeng Biotechnol. 2022 Mar 8;10:823933. doi: 10.3389/fbioe.2022.823933 (PMC8957921; doi:10.3389/fbioe.2022.823933)
Supplement: Supplementary file 1 [file Table1.XLSX]

## Sheet: Compound List
Index	QR code	ID	MOLENAME	CAS	Weight	Plate	Row	Col	SMILES	Formula	MolWt	Bioactivity	Pathways	Receptor	Target	Reference
1	1190059130	T2286	BIIB-021	848695-25-0	100μl,10Mmol/L	PLATE 001	A	2	Cc1cnc(c(c1OC)C)Cn1cnc2c1nc(nc2Cl)N	C14H15ClN6O	318.76	BIIB021 is an orally-available, fully synthetic inhibitor of HSP90(Ki=1.7 nM, EC50=38 nM).	Cytoskeletal Signaling; Metabolism	HSP90	HSP inhibitor	1. Lundgren, et al. Molecular Y Therapeutics (2009), 8(4), 921-929.2. Kasibhatla, et al. Journal of Medicinal Chemistry (2007), 50(12), 2767-2778.
2	1190059138	T0010	Mercaptopurine	50-44-2	100μl,10Mmol/L	PLATE 001	A	3	S=c1nc[nH]c2c1[nH]cn2	C5H4N4S	152.18	Mercaptopurine is an antimetabolite antineoplastic agent with immunosuppressant properties. It interferes with nucleic acid synthesis by inhibiting purine metabolism and is used, usually in combination with other drugs, in the treatment of or in remission maintenance programs for leukemia.	Metabolism; Others	IMPDH; HPRT	Dehydrogenase inhibitor; Others	1. Dubinsky MC, et al. Clin Gastroenterol Hepatol. 2004 Sep;2(9):731-43.
3	1190059154	T0114	Trichlormethiazide	133-67-5	100μl,10Mmol/L	PLATE 001	A	5	NS(=O)(=O)c1c(Cl)cc2NC(NS(=O)(=O)c2c1)C(Cl)Cl	C8H8Cl3N3O4S2	380.66	Trichlormethiazide is a short-acting, 3-dichloromethyl derivative of hydrochlorothiazide, belonging to the class of thiazide diuretics. Trichlormethiazide appears to block the active reabsorption of chloride and possibly sodium in the ascending loop of Henle, altering electrolyte transfer in the proximal tubule.	Membrane transporter/Ion channel; Metabolism	Na+/K+-ATPase; Carbonic anhydrase	ATPase inhibitor; Carbonic Anhydrase inhibitor	1. Temperini C, et al. Bioorg Med Chem. 2009 Feb 1;17(3):1214-21.
4	1190059162	T0142	Brinzolamide	138890-62-7	100μl,10Mmol/L	PLATE 001	A	6	CCN[C@H]1CN(CCCOC)S(=O)(=O)c2c1cc(s2)S(=O)(=O)N	C12H21N3O5S3	383.51	Brinzolamide is a Carbonic Anhydrase Inhibitor. The mechanism of action of brinzolamide is as a Carbonic Anhydrase Inhibitor.	Metabolism	Carbonic anhydrase II	Carbonic Anhydrase inhibitor	1. Stams T, et al. Protein Sci. 1998 Mar;7(3):556-63.
5	1190059170	T0153	Oltipraz	64224-21-1	100μl,10Mmol/L	PLATE 001	A	7	Cc1c(ssc1=S)c1nccnc1	C8H6N2S3	226.34	Oltipraz is a synthetic dithiolethione with potential chemopreventive and anti-angiogenic properties. Oltipraz induces phase II detoxification enzymes, such as glutathione S transferase (GST) and NAD(P)H: quinone oxidoreductase 1 (NQO1). The induction of detoxification enzymes enhances the detoxification of certain cancer-causing agents, thereby enhancing their elimination and preventing carcinog…	Microbiology&Virology	Reverse Transcriptase	Reverse Transcriptase inhibitor	1. Zhang Y, Gordon GB. Mol Y Ther. 2004 Jul;3(7):885-93.
6	1190059178	T0189	Pemetrexed acid	137281-23-3	100μl,10Mmol/L	PLATE 001	A	8	Nc1nc(=O)c2c([nH]cc2CCc2ccc(cc2)C(=O)N[C@@H](CCC(=O)O)C(=O)O)[nH]1	C20H21N5O6	427.41	Pemetrexed, a guanine-derived antineoplastic agent, binds to and inhibits the enzyme thymidylate synthase (TS).	DNA Damage/DNA Repair; Metabolism	DHFR; GARFT; Thymidylate synthase	DHFR inhibitor; DNA/RNA Synthesis inhibitor	1. Shih C, et al. Y Res. 1997, 57(6), 1116-1123.
7	1190059186	T0245	Mycophenolate mofetil	115007-34-6	100μl,10Mmol/L	PLATE 001	A	9	CC1=C(C(=C(C2=C1COC2=O)O)C/C=C(\C)/CCC(=O)OCCN3CCOCC3)OC	C23H31NO7	433.5	Mycophenolate mofetil, an immunosuppressive agent, is the 2-morpholinoethyl ester of mycophenolic acid (MPA), and an inhibitor of inosine monophosphate dehydrogenase (IMPDH).	Metabolism	IMPDH	Dehydrogenase inhibitor	1. Nakanishi T, et al. Int Immunopharmacol. 2010, 10(1), 91-97.
8	1190059146	T0054	Disulfiram	97-77-8	100μl,10Mmol/L	PLATE 001	A	4	CCN(CC)C(=S)SSC(=S)N(CC)CC	C10H20N2S4	296.54	Disulfiram is a carbamate derivative used as an alcohol deterrent. It is a relatively nontoxic substance when administered alone, but markedly alters the intermediary metabolism of alcohol. When alcohol is ingested after administration of disulfiram, blood acetaldehyde concentrations are increased, followed by flushing, systemic vasodilation, respiratory difficulties, nausea, hypotension, and oth…	Metabolism	ALDH1; DBH	Dehydrogenase inhibitor	1. Mackenzie IS, et al. Arterioscler Thromb Vasc Biol. 2005 Sep; 25(9):1891-5.
9	1190059194	T0251	Gemcitabine	95058-81-4	100μl,10Mmol/L	PLATE 001	A	10	Nc1nc(=O)n(cc1)[C@@H]1O[C@H](CO)[C@@H](O)C1(F)F	C9H11F2N3O4	263.2	Gemcitabine is a DNA synthesis inhibitor that can inhibit the growth of MIAPaCa2, BxPC3 and Capan2 cells (IC50s: 40/18/12 nM). It can also induce autophagy.	Autophagy; DNA Damage/DNA Repair; Others	Autophagy; DNA synthesis	Autophagy activator; DNA/RNA Synthesis inhibitor	1. Wang H, et al. Enhanced efficacy of Gemcitabine by indole-3-carbinol in pancreatic cell lines: the role of human equilibrativenucleoside transporter 1. Anticancer Res. 2011 Oct;31(10):3171-80.
10	1190059202	T0254	Probucol	23288-49-5	100μl,10Mmol/L	PLATE 001	A	11	CC(C)(Sc1cc(c(O)c(c1)C(C)(C)C)C(C)(C)C)Sc1cc(c(O)c(c1)C(C)(C)C)C(C)(C)C	C31H48O2S2	516.84	Probucol, an anti-hyperlipidemic drug, can lower the level of cholesterol in the bloodstream by increasing the LDL catabolic rate.	Membrane transporter/Ion channel; Metabolism	ABCA1; CES1	ABC agonist; Lipid inhibitor	1. Jeon SM, et al. J Biochem Mol Toxicol. 2005, 19(5):336-46.
11	1190059131	T0267	Zonisamide	68291-97-4	100μl,10Mmol/L	PLATE 001	B	2	NS(=O)(=O)Cc1noc2ccccc12	C8H8N2O3S	212.23	Zonisamide, a sulfonamide anticonvulsant, is approved for use as an adjunctive treatment in adults with partial-onset seizures. It may inhibit a carbonic anhydrase although this is not one of the main mechanisms of action. Zonisamide may act by blocking repetitive firing of voltage-gated sodium channels results in a reduction of T-type calcium channel currents, or by binding allosterically to GAB…	Membrane transporter/Ion channel; Metabolism	Calcium Channel; Carbonic anhydrase; Sodium Channel	Calcium Channel inhibitor; Carbonic Anhydrase inhibitor; Sodium Channel inhibitor	1. Tsujii S, et al. Eur J Pharmacol. 2015 Jan 5;746:301-7.
12	1190059139	T0270	Hydrocortisone butyrate	13609-67-1	100μl,10Mmol/L	PLATE 001	B	3	O([C@]1([C@@]2([C@H]([C@H]3[C@@H]([C@@]4(C(=CC(=O)CC4)CC3)C)[C@@H](O)C2)CC1)C)C(=O)CO)C(=O)CCC	C25H36O6	432.55	Hydrocortisone Butyrate is a synthetic glucocorticoid receptor agonist with antiinflammatory, antipruritic and vasoconstrictive effects.	GPCR/G Protein; Metabolism	Annexin A1; Glucocorticoid Receptor	Annexin A; GR	1. Grossman R, et al. Ann N Y Acad Sci. 2006 Jul;1071:410-21.
13	1190059147	T0337	Prednisolone-21-acetate	52-21-1	100μl,10Mmol/L	PLATE 001	B	4	O[C@]1([C@@]2([C@H]([C@H]3[C@@H]([C@@]4(C(=CC(=O)C=C4)CC3)C)[C@@H](O)C2)CC1)C)C(=O)COC(=O)C	C23H30O6	402.48	Prednisolone Acetate is the acetate salt form of prednisolone, a synthetic glucocorticoid with anti-inflammatory and immunomodulating properties.	Metabolism	Glucocorticoid Receptor	GR inhibitor	1. Ikonomidis I, et al. Heart. 2009 Sep;95(18):1502-7.
14	1190059155	T0353	Osalmid	526-18-1	100μl,10Mmol/L	PLATE 001	B	5	Oc1ccc(NC(=O)c2ccccc2O)cc1	C13H11NO3	229.23	Osalmid is a choleretic drug, inhibits ribonucleotide reductase activity by targeting ribonucleotide reductase small subunit M2 (RRM2).	DNA Damage/DNA Repair	RR	DNA/RNA Synthesis inhibitor	1. Sadanaga T, et al. J Chromatogr. 1981 Apr 10;223(1):243-6.
15	1190059163	T0515	Tioxolone	4991-65-5	100μl,10Mmol/L	PLATE 001	B	6	Oc1cc2c(sc(=O)o2)cc1	C7H4O3S	168.17	Tioxolone is a metalloenzyme carbonic anhydrase I inhibitor.	Metabolism	Carbonic anhydrase I	Carbonic Anhydrase inhibitor	1. Byres M, Cox PJ. Acta Crystallogr C. 2004 Jun;60(Pt 6):o395-6.
16	1190059171	T0123	Sulfanilamide	63-74-1	100μl,10Mmol/L	PLATE 001	B	7	Nc1ccc(cc1)S(=O)(=O)N	C6H8N2O2S	172.2	Sulfanilamide can competitively inhibit bacterial enzyme dihydropteroate synthetase with IC50 of 320 μM.	Autophagy	DHPS	Autophagy inhibitor	1. Preissner S, et al. Nucleic Acids Res. 2010 Jan; 38(Database issue):D237-43.
17	1190059179	T0964	Floxuridine	50-91-9	100μl,10Mmol/L	PLATE 001	B	8	[C@@H]1(n2c(=O)[nH]c(=O)c(c2)F)O[C@@H]([C@H](C1)O)CO	C9H11FN2O5	246.19	Floxuridine is an antimetabolite, floxuridine inhibits thymidylate synthase, resulting in disruption of DNA synthesis and cytotoxicity.	DNA Damage/DNA Repair	Thymidylate synthase	DNA/RNA Synthesis inhibitor	1. Ferguson PJ, et al. Br J Pharmacol. 1999 Aug; 127(8):1777-86.
18	1190059187	T0984	Fluorouracil	51-21-8	100μl,10Mmol/L	PLATE 001	B	9	Fc1c[nH]c(=O)[nH]c1=O	C4H3FN2O2	130.08	Fluorouracil interrupts nucleotide synthetic by inhibiting thymidylate synthase (TS) in tumor cells.	DNA Damage/DNA Repair	Thymidylate synthase	DNA/RNA Synthesis	1. Milczarek M, et al. Autophagic cell death and premature senescence: New mechanism of 5-fluorouracil and sulforaphane synergistic anticancer effect in MDA-MB-231 triple negative breast cancer cell line. Food Chem Toxicol. 2018 Jan;111:1-8.
19	1190059195	T0987	Gimeracil	103766-25-2	100μl,10Mmol/L	PLATE 001	B	10	Oc1cc(=O)[nH]cc1Cl	C5H4ClNO2	145.54	Gimeracil is a competitive, reversible inhibitor of dihydropyrimidine dehydrogenase.	Autophagy	DHPS	Autophagy inhibitor	1. Prescrire Int. 2013 May;22(138):122.
20	1190059203	T0988	Trimetazidine dihydrochloride	13171-25-0	100μl,10Mmol/L	PLATE 001	B	11	Cl.COc1c(OC)c(OC)c(CN2CCNCC2)cc1.Cl	C14H22N2O3·2HCl	339.26	Trimetazidine dihydrochloride can improve myocardial glucose utilization by inhibiting fatty acid metabolism. Trimetazidine is the first cytoprotective anti-ischemic agent, also used as a vasodilator in ischemic heart disease or angina.	Metabolism	mitochondrial long-chain 3-ketoacyl thiolase	Fatty Acid Synthase inhibitor	1. Kantor PF, et al. Circ Res. 2000 Mar 17;86(5):580-8.
21	1190059132	T1025	Tranylcypromine (2-PCPA) hydrochloride	1986-47-6	100μl,10Mmol/L	PLATE 001	C	2	Cl.N[C@@H]1C[C@H]1c1ccccc1	C9H11N·HCl	169.66	Tranylcypromine Hydrochloride, a monoamine oxidase inhibitor, is effective in the treatment of major depression, dysthymic disorder, and atypical depression. It is a propylamine formed from the cyclization of the side chain of amphetamine. It also is useful in panic and phobic disorders.	Metabolism	MAO	MAO inhibitor	1. Taavitsainen P, et al. Drug Metab Dispos, 2001, 29(3), 217-222.
22	1190059140	T1026	Mafenide hydrochloride	138-37-4	100μl,10Mmol/L	PLATE 001	C	3	Cl.NCc1ccc(cc1)S(=O)(=O)N	C7H11ClN2O2S	222.69	Mafenide hydrochloride is a sulfonamide that inhibits the enzyme carbonic anhydrase and is used as topical anti-infective, especially in burn therapy.	Metabolism	Carbonic anhydrase VI	Carbonic Anhydrase inhibitor	1. Demirdag R, et al. Bioorg Med Chem. 2013 Mar 15;21(6):1522-5.
23	1190059148	T1153	Trimethoprim	738-70-5	100μl,10Mmol/L	PLATE 001	C	4	COc1cc(Cc2cnc(N)nc2N)cc(OC)c1OC	C14H18N4O3	290.32	Trimethoprim is a Dihydrofolate Reductase Inhibitor Antibacterial. The mechanism of action of trimethoprim is as a Dihydrofolate Reductase Inhibitor, and Cytochrome P450 2C8 Inhibitor, and Organic Cation Transporter 2 Inhibitor.	DNA Damage/DNA Repair; Metabolism	DHFR; Thymidylate synthase	DHFR inhibitor; DNA/RNA Synthesis inhibitor	1. Flockhart DA. Accessed May 28, 2010.
24	1190059156	T0699	Sulfamonomethoxine	1220-83-3	100μl,10Mmol/L	PLATE 001	C	5	COc1ncnc(NS(=O)(=O)c2ccc(N)cc2)c1	C11H12N4O3S	280.31	Sulfamonomethoxine is a long-acting sulfonamide antibacterial agent, blocks the synthesis of folic acid by inhibiting synthetase of dihydropteroate.	Microbiology&Virology	Antibacterial	Antibacterial	1. Ma J, et al. Environ Sci Pollut Res Int. 2014 Jun;21(12):7436-48.
25	1190059164	T0693	Niflumic acid	4394-00-7	100μl,10Mmol/L	PLATE 001	C	6	OC(=O)c1c(Nc2cccc(c2)C(F)(F)F)nccc1	C13H9F3N2O2	282.22	Niflumic acid is a Ca2+-activated Cl- channel blocker and an analgesic and anti-inflammatory agent used in the therapy of rheumatoid arthritis.	Immunology/Inflammation; Membrane transporter/Ion channel; Metabolism; Others; Neuroscience	COX; Monocarboxylate transporter; Chloride channel protein ClC-Ka; PLA2; UGT	COX inhibitor; Monocarboxylate transporter inhibitor; Others inducer; Phospholipase inhibitor; UGT inhibitor	1. Jabeen T, et al. Acta Crystallogr D Biol Crystallogr. 2005 Dec;61(Pt 12):1579-86.
26	1190059172	T0686	Orlistat	96829-58-2	100μl,10Mmol/L	PLATE 001	C	7	C(=O)([C@@H](NC=O)CC(C)C)O[C@@H](CCCCCCCCCCC)C[C@@H]1OC(=O)[C@H]1CCCCCC	C29H53NO5	495.73	Orlistat is an Intestinal Lipase Inhibitor. The mechanism of action of orlistat is as a Lipase Inhibitor.	Metabolism; Others	FAS; triacylglycerol lipase	Fatty Acid Synthase inhibitor; Others inhibitor	1. Uusitupa M. Curr Opin Lipidol. 1999 Feb;10(1):3-7.
27	1190059180	T0672	Pravastatin sodium	81131-70-6	100μl,10Mmol/L	PLATE 001	C	8	[C@H]12[C@H](C[C@H](O)C=C1C=C[C@H](C)[C@@H]2CC[C@@H](O)C[C@@H](O)CC(=O)[O-])OC(=O)[C@@H](C)CC.[Na+]	C23H35NaO7	446.52	Pravastatin sodium, an HMG-CoA reductase inhibitor, inhibits sterol synthesis with IC50 of 5.6 μM.	Metabolism	HMG-CoA reductase	HMG-CoA Reductase inhibitor	1. Kurakata S, et al. Immunopharmacology, 1996, 34(1), 51-61.
28	1190059188	T0677	Chlorothiazide	58-94-6	100μl,10Mmol/L	PLATE 001	C	9	NS(=O)(=O)c1c(Cl)cc2NC=NS(=O)(=O)c2c1	C7H6ClN3O4S2	295.72	Chlorothiazide is a thiazide diuretic with actions and uses similar to those of HYDROCHLOROTHIAZIDE.	Metabolism	Carbonic anhydrase	Carbonic Anhydrase inhibitor	1. Schmidt H, et al. Horm Metab Res. 2001 Jun;33(6):354-7.
29	1190059196	T0675	Topiramate	97240-79-4	100μl,10Mmol/L	PLATE 001	C	10	[C@@H]12CO[C@@]3(COS(=O)(=O)N)OC(C)(C)O[C@H]3[C@@H]1OC(C)(C)O2	C12H21NO8S	339.36	Topiramate is a unique antiseizure medication that is used in the treatment of partial and generalized seizures. Topiramate has been rarely associated with hepatic injury and largely when used in combination with other anticonvulsant medications.	Membrane transporter/Ion channel; Metabolism; Neuroscience	Carbonic anhydrase; GABAR; mGluR5	Carbonic Anhydrase inhibitor; GABA Receptor antagonist; GluR antagonist	1. Nowakowska E, et al. Arzneimittelforschung. 2009;59(10):487-92.
30	1190059204	T0921	Sulfabenzamide	127-71-9	100μl,10Mmol/L	PLATE 001	C	11	Nc1ccc(cc1)S(=O)(=O)NC(=O)c1ccccc1	C13H12N2O3S	276.31	Sulfabenzamide is a sulfonamide antibacterial agent used alone or with sulfathiazole and sulfacetamide as a topical, intravaginal antibacterial preparation.	Microbiology&Virology	Antibacterial	Antibacterial	1. Bagheri F, et al. Mol Biol Rep. 2014 Nov; 41(11):7387-94.
31	1190059133	T0782	Benzthiazide	91-33-8	100μl,10Mmol/L	PLATE 001	D	2	NS(=O)(=O)c1c(Cl)cc2NC(=NS(=O)(=O)c2c1)CSCc1ccccc1	C15H14ClN3O4S3	431.94	Benzthiazide is used in the therapy of edema and hypertension. Like other thiazides, benzthiazide accelerates water loss from the body (diuretics). They inhibit Na+/Cl- reabsorption from the distal convoluted tubules in the kidneys. Thiazides also cause loss of potassium and an increase in serum uric acid. Thiazides are often used to treat hypertension, but their hypotensive effects are not neces…	Metabolism	Carbonic anhydrase	Carbonic Anhydrase inhibitor	1. Temperini C, et al. Bioorg Med Chem. 2009 Feb 1;17(3):1214-21.
32	1190059141	T0813	Acetazolamide	59-66-5	100μl,10Mmol/L	PLATE 001	D	3	CC(=O)Nc1nnc(s1)S(=O)(=O)N	C4H6N4O3S2	222.25	Acetazolamide is a Carbonic Anhydrase Inhibitor. The mechanism of action of acetazolamide is as a Carbonic Anhydrase Inhibitor. The chemical classification of acetazolamide is Sulfonamides.	Metabolism	Carbonic anhydrase	Carbonic Anhydrase inhibitor	1. Puscas I, et al. J Pharmacol Exp Ther. 1996 Jun;277(3):1464-6.
33	1190059149	T0849	Pyrimethamine	58-14-0	100μl,10Mmol/L	PLATE 001	D	4	CCc1c(c(N)nc(N)n1)c1ccc(Cl)cc1	C12H13ClN4	248.71	Pyrimethamine is a competitive inhibitor of dihydrofolate reductase (DHFR), used as an antimalarial drug.	Metabolism	DHFR	DHFR inhibitor	1. Rastelli G, et al. Bioorg Med Chem Lett. 2003 Oct 6;13(19):3257-60.
34	1190059157	T0942	Quinacrine dihydrochloride	69-05-6	100μl,10Mmol/L	PLATE 001	D	5	CCN(CC)CCCC(C)Nc1c2ccc(cc2nc2c1cc(cc2)OC)Cl.Cl.Cl	C23H30CLN3O·2HCl	472.88	Quinacrine Hydrochloride is the dihydrochloride salt of the 9-aminoacridine derivative quinacrine with potential antineoplastic and antiparasitic activities.	GPCR/G Protein; DNA Damage/DNA Repair; Metabolism; Immunology/Inflammation; Neuroscience	DNA; Histamine N-methyltransferase; PLA2; PLCLP	DNA Alkylation inhibitor; Histamine Receptor inhibitor; Phospholipase inhibitor	1. Nuttle LC, et al. Am J Physiol. 1999 Apr;276(4 Pt 2):H1289-94.
35	1190059165	T1409	Methocarbamol	532-03-6	100μl,10Mmol/L	PLATE 001	D	6	COc1ccccc1OCC(O)COC(=O)N	C11H15NO5	241.24	Methocarbamol is a centrally acting muscle relaxant whose mode of action has not been established. It is used as an adjunct in the symptomatic treatment of musculoskeletal conditions associated with painful muscle spasm.	Metabolism	CA1	Carbonic Anhydrase inhibitor	1. Parr JS, Khalifah RG. J Biol Chem. 1992 Dec 15; 267(35):25044-50.
36	1190059173	T1426	Pyrazinamide	98-96-4	100μl,10Mmol/L	PLATE 001	D	7	c1(cnccn1)C(=O)N	C5H5N3O	123.11	Pyrazinamide, an antimycobacterial, is utilized therapeutically as an antitubercular agent, which is a synthetic pyrazinoic acid amide derivative.	Metabolism	FAS	Fatty Acid Synthase inhibitor	1. Zimhony O, et al. Nat Med. 2000 Sep; 6(9):1043-7.
37	1190059181	T1428	Trifluridine	70-00-8	100μl,10Mmol/L	PLATE 001	D	8	[C@@H]1(n2cc(c(=O)[nH]c2=O)C(F)(F)F)O[C@@H]([C@H](C1)O)CO	C10H11F3N2O5	296.2	Trifluridine is a fluorinated thymidine analog with potential antineoplastic activity. Trifluridine is incorporated into DNA and inhibits thymidylate synthase, resulting in inhibition of DNA synthesis, inhibition of protein synthesis, and apoptosis. This agent also exhibits antiviral activity.	DNA Damage/DNA Repair	DNA/RNA Synthesis; Thymidylate synthase	DNA/RNA Synthesis inhibitor	1. Shintani M, et al. Oncol Rep. 2010 May; 23(5):1345-50.
38	1190059189	T1440	Ethacridine lactate monohydrate	6402-23-9	100μl,10Mmol/L	PLATE 001	D	9	c1cc(cc2nc3ccc(cc3c(c12)N)OCC)N.C(=O)(C(C)O)O.O	C18H23N3O5	361.4	Ethacridine lactate hydrate is a topically applied anti-infective agent.	Microbiology&Virology	Antibiotic	Antibiotic	1. Junka A, et al. Int Wound J, 2013.
39	1190059197	T1449	Hydrochlorothiazide	58-93-5	100μl,10Mmol/L	PLATE 001	D	10	NS(=O)(=O)c1c(Cl)cc2NCNS(=O)(=O)c2c1	C7H8ClN3O4S2	297.74	Hydrochlorothiazide is a Thiazide Diuretic. The physiologic effect of hydrochlorothiazide is by means of Increased Diuresis.	Membrane transporter/Ion channel; Metabolism	Carbonic anhydrase; Potassium Channel	Carbonic Anhydrase inhibitor; Potassium Channel	1. Ran XW, et al. Sichuan Da Xue Xue Bao Yi Xue Ban. 2005 Jul; 36(4):583-7.
40	1190059205	T1465	Mupirocin	12650-69-0	100μl,10Mmol/L	PLATE 001	D	11	[C@H]1([C@H](CO[C@H]([C@@H]1O)C/C(=C/C(=O)OCCCCCCCCC(=O)O)/C)C[C@H]1[C@@H](O1)[C@H]([C@H](C)O)C)O	C26H44O9	500.64	Mupirocin is a RNA synthetase inhibitor antibacterial. It has shown excellent activity against gram-positive staphylococci and streptococci.	DNA Damage/DNA Repair	DNA synthesis	DNA/RNA Synthesis inhibitor	1. Hurdle JG, et al. J Antimicrob ChemOthers. 2004 Jan;53(1):102-4.
41	1190059134	T1473	Trilostane	13647-35-3	100μl,10Mmol/L	PLATE 001	E	2	[C@]123[C@@]([C@@H]4[C@@H](CC3)[C@H]3[C@](CC4)([C@H](CC3)O)C)(CC(=C([C@H]1O2)O)C#N)C	C20H27NO3	329.43	Trilostane is a synthetic derivative of androstane with adrenocortical suppressive properties. Trilostane reversibly inhibits 3 beta-hydroxysteroid dehydrogenase delta 5-4 isomerase in the adrenal cortex.	Metabolism	3 β-hydroxysteroid dehydrogenase	Dehydrogenase inhibitor	1. Puddefoot JR, et al. Expert Opin PharmacOthers. 2006 Dec;7(17):2413-9.
42	1190059142	T1676	Rosuvastatin	287714-41-4	100μl,10Mmol/L	PLATE 001	E	3	c1(c(c(nc(n1)N(S(=O)(=O)C)C)c1ccc(cc1)F)/C=C/[C@H](C[C@H](CC(=O)O)O)O)C(C)C	C22H28FN3O6S	481.54	Rosuvastatin is an antilipemic agent that competitively inhibits hydroxymethyl-glutaryl-coenzyme A (HMG-CoA) reductase. HMG-CoA reductase catalyzes the conversion of HMG-CoA to mevalonic acid, the rate-limiting step in cholesterol biosynthesis. Rosuvastatin belongs to a class of medications called statins and is used to reduce plasma cholesterol levels and prevent cardiovascular disease.	Metabolism	HMG-CoA reductase	HMG-CoA Reductase inhibitor	1. Watanabe M, et al. Bioorg Med Chem, 1997, 5(2), 437-444.
43	1190059150	T1593	Ezetimibe	163222-33-1	100μl,10Mmol/L	PLATE 001	E	4	c1(ccc(cc1)[C@H](CC[C@H]1C(=O)N([C@@H]1c1ccc(cc1)O)c1ccc(cc1)F)O)F	C24H21F2NO3	409.43	Ezetimibe is a Dietary Cholesterol Absorption Inhibitor. The physiologic effect of ezetimibe is by means of Decreased Cholesterol Absorption.	Immunology/Inflammation; Membrane transporter/Ion channel; Others	NPC1L1; Nrf2; Sterol O-acyltransferase	NPC1L1 inhibitor; Nrf2 inhibitor; Others	1. Singh A, et al. J Ind Microbiol Biotechnol. 2009 Nov;36(11):1369-74.
44	1190059158	T2374	HTH-01-015	1613724-42-7	100μl,10Mmol/L	PLATE 001	E	5	Cn1c2cc3ccccc3cc2c(=O)n(C)c2c(C)nc(Nc3cn(nc3)C3CCNCC3)nc12	C26H28N8O	468.55	HTH-01-015 is a selective NUAK1 inhibitor (IC50=100 nM).	PI3K/Akt/mTOR signaling	NUAK1; NUAK2	AMPK inhibitor	1. Banerjee S, et al. Biochem J. 2014, 457(1), 215-225.
45	1190059166	T2355	CFTRinh-172	307510-92-5	100μl,10Mmol/L	PLATE 001	E	6	c1cc(cc(c1)N1C(=O)/C(=C/c2ccc(cc2)C(=O)O)/SC1=S)C(F)(F)F	C18H10F3NO3S2	409.4	CFTRinh-172 is a voltage-independent, selective CFTR inhibitor.	Membrane transporter/Ion channel	CFTR	CFTR inhibitor	1. Ma T, et al. J Clin Invest. 2002, 110(11), 1651-1658.
46	1190059174	T1830	BX795	702675-74-9	100μl,10Mmol/L	PLATE 001	E	7	Ic1cnc(Nc2cc(NC(=O)N3CCCC3)ccc2)nc1NCCCNC(=O)c1cccs1	C23H26IN7O2S	591.47	BX795 is an effective and selective PDK1 inhibitor (IC50: 6 nM), and its selectivity is 140- and 1600-fold for PDK1 over PKA and PKC in cell-free assays, respectively. Meanwhile, the selectivity for PDK1 is 100-fold than GSK3β.	Cell Cycle/Checkpoint; PI3K/Akt/mTOR signaling; Tyrosine Kinase/Adaptors	CDK2/CyclinE; Chk1; c-Kit; PDK1	CDK inhibitor; Chk inhibitor; c-Kit inhibitor; PDK inhibitor	1. Feldman RI, et al. J Biol Chem. 2005, 280(20), 19867-19874.
47	1190059182	T1837	BX912	702674-56-4	100μl,10Mmol/L	PLATE 001	E	8	Brc1cnc(Nc2cc(NC(=O)N3CCCC3)ccc2)nc1NCCc1cnc[nH]1	C20H23BrN8O	471.35	BX-912 is a specific inhibitor of 3-Phosphoinositide-dependent Kinase-1 (PDK1, IC50: 12 nM). The selectivity of BX-912 is more 10 fold than C-Kit, EGFR, PKA, PKC etc.	Angiogenesis; Cell Cycle/Checkpoint; GPCR/G Protein; PI3K/Akt/mTOR signaling; Tyrosine Kinase/Adaptors	CDK2/CyclinE; Chk1; PDK1; PKA; VEGFR2 (KDR)	CDK inhibitor; Chk inhibitor; PDK inhibitor; PKA inhibitor; VEGFR inhibitor	1. Feldman RI, et al. J Biol Chem. 2005, 280(20), 19867-19874.
48	1190059190	T2268	VER-49009	940289-57-6	100μl,10Mmol/L	PLATE 001	E	9	c1(c(cc(c(c1)c1c(c([nH]n1)C(=O)NCC)c1ccc(cc1)OC)O)O)Cl	C19H18ClN3O4	387.82	VER-49009 is an effective HSP90 inhibitor(IC50 =25 nM, Kd=78 nM).	Cytoskeletal Signaling; Metabolism	HSP90β	HSP inhibitor	1. Sharp SY, et al. Mol Y Ther. 2007, 6(4), 1198-1211.
49	1190059198	T2304	SP2509	1423715-09-6	100μl,10Mmol/L	PLATE 001	E	10	C(=O)(c1cc(ccc1)S(=O)(=O)N1CCOCC1)N/N=C(\C)/c1c(ccc(c1)Cl)O	C19H20ClN3O5S	437.9	SP2509 is a specific histone demethylase LSD1 inhibitor(IC50 =13 nM).	Chromatin/Epigenetic	LSD1	Histone Demethylase inhibitor	1. Fiskus W, et al. Leukemia. 2014, 28(11), 2155-2164.
50	1190059206	T2121	SW033291	459147-39-8	100μl,10Mmol/L	PLATE 001	E	11	CCCCS(=O)c1c(N)c2c(s1)nc(cc2c1ccccc1)c1cccs1	C21H20N2OS3	412.59	SW033291 is a small-molecule inhibitor of 15-PGDH (Ki=0.1 nM) that increases prostaglandin PGE2 levels in bone marrow and other tissues.	Metabolism	15-PGDH; 15-PGDH	Dehydrogenase inhibitor	1. Zhang Y, et al. Science. 2015 Jun 12;348(6240):aaa2340.
51	1190059135	T1982	Triapine	143621-35-6	100μl,10Mmol/L	PLATE 001	F	2	N(C(=S)N)/N=C/c1c(cccn1)N	C7H9N5S	195.24	Triapine is a novel inhibitor of the M2 subunit of ribonucleotide reductase (RR).	DNA Damage/DNA Repair	RR	DNA/RNA Synthesis inhibitor	1. Trondl R, et al. Mol Pharmacol. 2014 Mar;85(3):451-9.
52	1190059143	T2534	Pitavastatin calcium	147526-32-7	100μl,10Mmol/L	PLATE 001	F	3	[Ca+2].Fc1ccc(c2c(c(nc3c2cccc3)C2CC2)/C=C/[C@H](O)C[C@@H](O)CC(=O)[O-])cc1.Fc1ccc(c2c(c(nc3c2cccc3)C2CC2)/C=C/[C@H](O)C[C@@H](O)CC(=O)[O-])cc1	C50H46CaF2N2O8	880.98	Pitavastatin is a potent inhibitor of HMG-CoA reductase (Ki: 1.7 nM). It lowers both total cholesterol and low-density lipoprotein cholesterol in animals and humans. Metabolism of pitavastatin by the cytochrome P450 system is minimal, reducing the risk of drug-drug interactions.	Others	cholesterol esters	Others inhibitor	1. Ahmad H, et al. Cardiol Rev, 2010, 18(5):264-267.
53	1190059151	T2530	Levosimendan	141505-33-1	100μl,10Mmol/L	PLATE 001	F	4	O=C1NN=C(c2ccc(NN=C(C#N)C#N)cc2)[C@@H](C1)C	C14H12N6O	280.28	Levosimendan is a calcium sensitizer used in the management of acutely decompensated congestive heart failure. It increases the sensitivity of the heart to calcium, thus increasing cardiac contractility without a rise in intracellular calcium. Levosimendan exerts its effect by increasing calcium sensitivity of myocytes by binding to cardiac troponin C in a calcium-dependent manner.	Metabolism	Cardiac troponin C	Carbonic Anhydrase inhibitor	1. Haikala H, J Mol Cell Cardiol, 1995, 27(9), 1859-1866.
54	1190059159	T2238	Cariporide	159138-80-4	100μl,10Mmol/L	PLATE 001	F	5	CC(C)c1c(cc(cc1)C(=O)NC(=N)N)S(=O)(=O)C	C12H17N3O3S	283.35	Cariporide (HOE-642), an effective NHE1 inhibitor, has inhibitory effects on the degranulation of human platelets, the formation of platelet-leukocyte-aggregates, and the activation of the GPIIb/IIIa receptor (PAC-1).	Others	NHE2	Others inhibitor	1. Yang X, et al. J Surg Res. 2013 Dec;185(2):797-804. 2. Wu S, et al. Pharmacology. 2013; 91(3-4):123-30.

## Sheet: General Information
Anti-cancer Metabolism Compound Library (96-well)
For more information on TargetMol library service, please contact us via info@targetmol.com
Product Details:
Formulation		A collection of 112 Anti-cancer Metabolism Compound
Container		96 Well Format Sample Storage Tube With Cap and Optional 2D Barcode
Shipping		20 degrees below zero
Standard		100ul,10mMol/L
Plate layout:D-01
	1	2	3	4	5	6	7	8	9	10	11	12
a	Empty	848695-25-0	50-44-2	97-77-8	133-67-5	138890-62-7	64224-21-1	137281-23-3	115007-34-6	95058-81-4	23288-49-5	Empty
		BIIB-021	Mercaptopurine	Disulfiram	Trichlormethiazide	Brinzolamide	Oltipraz	Pemetrexed acid	Mycophenolate mofetil	Gemcitabine	Probucol
b	Empty	68291-97-4	13609-67-1	52-21-1	526-18-1	4991-65-5	63-74-1	50-91-9	51-21-8	103766-25-2	13171-25-0	Empty
	Empty	Zonisamide	Hydrocortisone butyrate	Prednisolone-21-acetate	Osalmid	Tioxolone	Sulfanilamide	Floxuridine	Fluorouracil	Gimeracil	Trimetazidine dihydrochloride	Empty
c	Empty	1986-47-6	138-37-4	738-70-5	1220-83-3	4394-00-7	96829-58-2	81131-70-6	58-94-6	97240-79-4	127-71-9	Empty
f	Empty	Tranylcypromine (2-PCPA) hydrochloride	Mafenide hydrochloride	Trimethoprim	Sulfamonomethoxine	Niflumic acid	Orlistat	Pravastatin sodium	Chlorothiazide	Topiramate	Sulfabenzamide	Empty
d	Empty	91-33-8	59-66-5	58-14-0	69-05-6	532-03-6	98-96-4	70-00-8	6402-23-9	58-93-5	12650-69-0	Empty
h	Empty	Benzthiazide	Acetazolamide	Pyrimethamine	Quinacrine dihydrochloride	Methocarbamol	Pyrazinamide	Trifluridine	Ethacridine lactate monohydrate	Hydrochlorothiazide	Mupirocin	Empty
e	Empty	13647-35-3	287714-41-4	163222-33-1	1613724-42-7	307510-92-5	702675-74-9	702674-56-4	940289-57-6	1423715-09-6	459147-39-8	Empty
b	Empty	Trilostane	Rosuvastatin	Ezetimibe	HTH-01-015	CFTRinh-172	BX795	BX912	VER-49009	SP2509	SW033291	Empty
f	Empty	143621-35-6	147526-32-7	141505-33-1	159138-80-4	1009820-21-6	943962-47-8	1210004-12-8	134523-03-8	1462249-75-7	30299-08-2	Empty
d	Empty	Triapine	Pitavastatin calcium	Levosimendan	Cariporide	Silmitasertib	BMS-303141	JZL195	Atorvastatin Calcium	PFK-158	Clinofibrate	Empty
g	Empty	82571-53-7	178606-66-1	108605-62-5	59-05-2	14892-97-8	554-57-4	93957-55-2	147098-20-2	1402836-58-1	1609960-31-7	Empty
f	Empty	Ozagrel	U-104	Teriflunomide	Methotrexate	SCR7 pyrazine	Methazolamide	Fluvastatin sodium salt	Rosuvastatin calcium	NLG919	TH588	Empty
h	Empty	297730-17-7	200484-11-3	1235481-43-2	1235481-90-9	1191951-57-1	844499-71-4	742112-33-0	724741-75-7	65646-68-6	747412-49-3	Empty
h	Empty	AVN944	CHS 828	(R)-P7C3-Ome	P7C3-A20	PHT-427	A 769662	Osu-03012	STF-31	Fenretinide	Luminespib	Empty
Plate layout:D-02
	1	2	3	4	5	6	7	8	9	10	11	12
a	Empty	1472624-85-3	593960-11-3	717824-30-1	284028-89-3	301353-96-8	1374356-45-2	1448671-31-5	1609960-30-6	78712-43-3	1533426-72-0	Empty
		7ACC2	PIK-93	Vidofludimus	XAV-939	P7C3	(S)-crizotinib	AZD-3965	TH287 hydrochloride	Ozagrel hydrochloride	SCR7
b	Empty	1448347-49-6	2156-56-1	738606-46-7	218600-53-4	911222-45-2	120-97-8	1203494-49-8	1214265-58-3	122111-03-9	1439399-58-2	Empty
	Empty	Ivosidenib	Sodium Dichloroacetate	ETC-1002	Bardoxolone Methyl	Rabusertib	Dichlorphenamide	DASA-58	WZ4003	Gemcitabine HCl	CB-839	Empty
c	Empty	1799753-84-6	64924-67-0	894187-61-2	147149-76-6	1260075-17-9	850717-64-5	94164-88-2	95809-78-2	1101854-58-3	1380424-42-9	Empty
f	Empty	BAY-876	Halofuginone hydrobromide	STF-118804	Nolatrexed	Mitapivat	BX-517	PKM2 inhibitor	CPI-613	JZL184	KML29	Empty
d	Empty	1223397-11-2	314045-39-1									Empty
h	Empty	WZB117	BPTES									Empty
e	Empty											Empty
b	Empty											Empty
f	Empty											Empty
d	Empty											Empty
g	Empty											Empty
f	Empty											Empty
h	Empty											Empty
h	Empty											Empty
